# Supplementary material for: Impact of depth of response on survival in patients treated with cobimetinib ± vemurafenib: pooled analysis of BRIM-2, BRIM-3, BRIM-7 and coBRIM
Source: PubMed Central journal article supplement (PMC6889491; doi:10.1038/s41416-019-0546-y), 2019-08-16
Supplement: 41416_2019_546_MOESM2_ESM.pdf [file 41416_2019_546_MOESM2_ESM.pdf]

# BRIM2 IRB List

Study NP22657 IRB / EC List

IND: 73,620

(RO5185428) Roche Clinical Study Report - Protocol NP22657 - Research Report  
 1009633 1428

| Institution                      | Site No. | CRTN   | IRB / IEC Name                                     | Address                                                                                   | Action(s)                                                                                                                           | Approval Dates                                                               |
|----------------------------------|----------|--------|----------------------------------------------------|-------------------------------------------------------------------------------------------|-------------------------------------------------------------------------------------------------------------------------------------|------------------------------------------------------------------------------|
| University of Colorado           | 102      | 165862 | Western Institutional Review Board                 | 3535 Seventh Ave, SW<br>Olympia, WA 98502                                                 | Initial Approval<br>ICF (17 yr old)<br>Protocol B<br>ICF                                                                            | 16-Oct-09<br>20-Nov-09<br>28-May-10<br>10-Sep-10                             |
| Calvary Mates Newcastle, AUS     | 103      | 165550 | Hunter New England Human Research Ethics Committee | Locked Bag 1<br>New Lambton, NSW<br>2305<br>AUSTRALIA                                     | Initial Approval<br>ICF<br>Protocol B                                                                                               | 13-Aug-09<br>25-Mar-10<br>15-Jul-10                                          |
| TX Oncology-Baylor Cancer Center | 104      | 165664 | Copernicus Group IRB                               | One Triangle Drive<br>Suite 100<br>P.O. Box 110605<br>Research Triangle<br>Park, NC 27709 | Initial Approval<br>ICF, IB Adden 2<br>Pt. Eligibility<br>Checklist<br><br>IB Adden 3<br>Protocol B, ICF<br>Re-Approval of<br>Study | 3-Sep-09<br>2-Oct-09<br>19-Nov-09<br><br>11-Dec-09<br>31-Mar-10<br>24-Jun-10 |
| Westmeade Hospital, AUS          | 105      | 166171 | Hunter New England Human Research Ethics Committee | Locked Bag 1<br>New Lambton, NSW<br>2305<br>AUSTRALIA                                     | ICF ver. 2 & 3<br>Initial Approval<br>ICF<br>Protocol B                                                                             | 25-Mar-10<br>13-Aug-09<br>25-Mar-10<br>15-Jul-10                             |

# BRIM2 IRB List

(R05185428) Roche Clinical Study Report - Protocol NP22657 - Research Report  
 1038633 1429

| Institution                     | Site No. | CRTN   | IRB / IEC Name                                                               | Address                                                                                                                                     | Action(s)                                                                        | Approval Dates                                       |
|---------------------------------|----------|--------|------------------------------------------------------------------------------|---------------------------------------------------------------------------------------------------------------------------------------------|----------------------------------------------------------------------------------|------------------------------------------------------|
| MD Anderson                     | 106      | 165728 | The University of Texas MD Anderson Cancer Center Institutional Review Board | Surveillance Committee<br>1515 Holcombe Blvd.,<br>Unit 083<br>Houston, TX 77030                                                             | Initial Approval<br>ICF<br>IB 5, Addendum<br>3<br>Protocol B                     | 27-Aug-09<br>12-Nov-09<br>15-Jan-10<br>10-Jun-10     |
| Hillman Cancer Center           | 107      | 165729 | Copernicus Group<br>IRB                                                      | One Triangle Drive<br>Suite 100<br>P.O. Box 110605<br>Research Triangle<br>Park, NC 27709                                                   | Initial Approval<br><br>IB Adden 3<br>Protocol B, ICF<br>Re-Approval of<br>Study | 19-Nov-09<br><br>11-Dec-09<br>31-Mar-10<br>24-Jun-10 |
| Massachusetts General           | 108      | 165727 | Dana-<br>Farber/Partners<br>CancerCare                                       | Office for Human<br>Research Studies<br>Dana Farber Cancer<br>Institute<br>20 Overland Street,<br>2 <sup>nd</sup> Floor<br>Boston, MA 02115 | Initial Approval<br>Protocol B<br>IB 6                                           | 15-Sep-09<br>20-May-10<br>17-Mar-10                  |
| Peter MacCallum Cancer Ctr, AUS | 109      | 165860 | Peter MacCallum<br>Cancer Centre<br>Human Research<br>Ethics Committee       | Peter MacCallum<br>Cancer Centre<br>St. Andrews Place<br>East Melbourne 3002<br>Victoria Australia                                          | Initial Approval<br>ICF; IB's<br>IB 6<br>Protocol B                              | 29-Sep-09<br>17-Dec-09<br>24-May-10<br>30-Jul-10     |

# BRIM2 IRB List

| Institution                        | Site No. | CRTN   | IRB / IEC Name             | Address                                                                                                  | Action(s)                                                                                              | Approval Dates                                               |
|------------------------------------|----------|--------|----------------------------|----------------------------------------------------------------------------------------------------------|--------------------------------------------------------------------------------------------------------|--------------------------------------------------------------|
| New York University Medical Center | 114      | 165998 | NYU School of Medicine IRB | 550 First Avenue<br>New York, NY 10016                                                                   | Initial Approval<br>IB 5, Addendum<br>2 & 3<br>IB 6<br>Protocol B, ICF                                 | 30-Oct-09<br>11-Dec-09<br><br>01-Mar-10<br>27-Apr-10         |
| Vanderbilt                         | 110      | 165551 | Vanderbilt University IRB  | 1313 21 <sup>st</sup> Avenue<br>South<br>504 Oxford House<br>Nashville, TN 37232                         | Initial Approval<br>ICF, 1572<br>Protocol B, ICF,<br>IB 6<br>Pt. Letter; ICF                           | 2-Nov-09<br>20-Jan-10<br>26-Apr-10<br>26-Aug-10              |
| UCLA                               | 111      | 166172 | UCLA IRB                   | Office for the<br>Protection of Research<br>Subjects<br>11000 Kinross Avenue<br>Los Angeles, CA<br>90095 | Initial Approval<br>Patient Diary<br>IB adden 2 & 3,<br>ICF<br>Protocol B, ICF<br>Continuing<br>Review | 11-Sep-09<br>07-Oct-09<br>4-Nov-09<br>21-Apr-10<br>23-Aug-10 |

(RO5185426) Roche Clinical Study Report - Protocol NP22657 - Research Report  
 1039633 1430

# BRIM2 IRB List

| Institution                | Site No. | CRTN   | IRB / IEC Name                  | Address                                                                                                                                                                 | Action(s)                                                                                                  | Approval Dates                                                                              |
|----------------------------|----------|--------|---------------------------------|-------------------------------------------------------------------------------------------------------------------------------------------------------------------------|------------------------------------------------------------------------------------------------------------|---------------------------------------------------------------------------------------------|
| University of Pennsylvania | 112      | 165553 | University of Pennsylvania IRB  | Committee on Studies Involving Human Beings<br>Office of Regulatory Affairs<br>University of Pennsylvania<br>3624 Market Street<br>Suite 3015<br>Philadelphia, PA 19104 | Initial Approval<br>ICF<br>ICF; IB's<br>ICF<br>Continuing Review<br><br>ICF w/ HIPAA Protocol B, ICF, IB 6 | 25-Aug-09<br>10-Sep-09<br>06-Jan-10<br>17-Feb-10<br>12-Aug-10<br><br>15-Dec-09<br>13-May-10 |
| Moffitt Cancer Center      | 113      | 165730 | Quorum Review                   | Quorum Review, Inc<br>1601 Fifth Ave. Ste 1000<br>Seattle, WA 98101                                                                                                     | Initial Approval<br>Protocol B, ICF<br>Protocol<br>Clarification Ltr<br>Re-Approval                        | 28-Aug-09<br>19-Apr-10<br>10-Jun-10<br>13-Aug-10                                            |
| Dana Farber                | 116      | 167097 | Dana-Farber/Partners CancerCare | Office for Human Research Studies<br>Dana Farber Cancer Institute<br>20 Overland Street, 2 <sup>nd</sup> Floor<br>Boston, MA 02115                                      | Activation                                                                                                 | 06-Nov-09                                                                                   |

(R05185426) Rodhe Clinical Study Report - Protocol NP22657 - Research Report  
 1098333 1431

## BRIM2 IRB List

| Institution | Site No. | CRTN   | IRB / IEC Name                  | Address                                                                                                                               | Action(s)  | Approval Dates |
|-------------|----------|--------|---------------------------------|---------------------------------------------------------------------------------------------------------------------------------------|------------|----------------|
| Beth Israel | 115      | 167098 | Dana-Farber/Partners CancerCare | Office for Human Research Studies<br>Dana Farber Cancer Institute<br>20 Overland Street,<br>2 <sup>nd</sup> Floor<br>Boston, MA 02115 | Activation | 30-Oct-09      |

(R05185426) Roche Clinical Study Report - Protocol NP-22657 - Research Report  
1009503 1432

## BRIM3 IRB List

venmarafenib (RO5185426) Roche Clinical Study Report - Protocol NO25026 -  
 Research Report 1039652 2623

| CRTN   | INVESTIGATOR      | IRB/IEC Name                                               | IRB/IEC Address                                                                                               | Country   | Approval Dates                                   | Date                                                      |
|--------|-------------------|------------------------------------------------------------|---------------------------------------------------------------------------------------------------------------|-----------|--------------------------------------------------|-----------------------------------------------------------|
| 201214 | Michael Millward  | Sir Charles Gairdner Group Human Research Ethics Committee | 1 <sup>st</sup> Floor E Block, Sir Charles Gairdner Hospital Hospital Avenue Nedlands, Western Australia 6009 | Australia | Protocol Version A<br>Amendment B<br>Amendment C | 11-FEB-10<br>15-SEP-10<br>01-DEC-10                       |
| 201001 | Phillip Parente   | Eastern Health Research & Ethics Committee                 | 5 Arnold St Box Hill, Victoria 3128                                                                           | Australia | Protocol Version A<br>Amendment B<br>Amendment C | 29-JAN-10<br>08-SEP-10<br>15-DEC-10                       |
| 201244 | Min-Ne Wu         | Bellberry Human Research Ethics Committee                  | Bellberry Limited 229 Greenhill Road Dulwich, South Australia 5065                                            | Australia | Protocol Version A<br>Amendment B<br>Amendment C | 27-NOV-09<br>09-JUL-10<br>19-NOV-10                       |
| 201009 | Felix Couture     | Comité d'éthique de l'hôtel Dieu de Quebec                 | 11, cote du Palais Quebec, Quebec G1R 2J6                                                                     | Canada    | Protocol Version A<br>Amendment B<br>Amendment C | 23-APR-10<br>14-DEC-10<br>18-JAN-11                       |
| 201217 | David Hogg        | Ontario Cancer REB                                         | 101 College St, Ste 800 Toronto, Ontario M5G 0A3                                                              | Canada    | Protocol Version A<br>Amendment B<br>Amendment C | 25-MAR-10<br>23-DEC-10<br>19-JAN-11                       |
| 201004 | Elsaine McWhirter | Ontario Cancer REB                                         | MaRS Centre, South Tower 101 College St, Ste 500 Toronto, Ontario M5G 1L7                                     | Canada    | Protocol Version A<br>Amendment B<br>Amendment C | 30-APR-10<br>Approval pending as of 04-MAR-11 for B and C |
| 201005 | Wilson Miller     | McGill Faculty of Medicine REB                             | 3655 Promenade Sir William Osler # 633 Montreal, Quebec H3G 1Y6                                               | Canada    | Protocol Version A<br>Amendment B<br>Amendment C | 24-FEB-10<br>25-OCT-10<br>02-DEC-10                       |
| 203103 | Wilson Miller     | McGill Faculty of Medicine REB                             | 3655 Promenade Sir William Osler # 633 Montreal, Quebec H3G 1Y6                                               | Canada    | Protocol Version A<br>Amendment B<br>Amendment C | 24-FEB-10<br>25-OCT-10<br>02-DEC-10                       |

## BRIM3 IRB List

| CRTN   | INVESTIGATOR      | IRB/IEC Name         | IRB/IEC Address                                           | Country | Approval Dates                                   | Date                                                                                                                                          |
|--------|-------------------|----------------------|-----------------------------------------------------------|---------|--------------------------------------------------|-----------------------------------------------------------------------------------------------------------------------------------------------|
| 201003 | Teresa Petrella   | Ontario Cancer REB   | 101 College Street, Suite 800<br>Toronto, Ontario M5G 0A3 | Canada  | Protocol Version A<br>Amendment B<br>Amendment C | 09-JUN-10<br>Approval<br>pending as of<br>04-MAR-11 for<br>B and C                                                                            |
| 201008 | Michael Smylie    | Alberta Cancer REC   | 1500-10123 99 Street<br>Edmonton, Alberta<br>T5J 3H1      | Canada  | Protocol Version A<br>Amendment B<br>Amendment C | 22-MAR-10<br>15-OCT-10<br>10-FEB-11                                                                                                           |
| 201010 | Ralph Wong        | Bannatyne Campus REB | 770 Bannatyne Ave<br>Winnipeg, Manitoba R3E 0W3           | Canada  | Protocol Version A<br>Amendment B<br>Amendment C | 21-APR-10<br>10-NOV-10<br>As per REB, no<br>need for<br>submission and<br>approval as it<br>has no effect on<br>patient care for<br>this site |
| 201183 | Didier Cupissol   | CPP IDF III          | Hôpital Tarnier-Cochin<br>89 rue d'Assas<br>Paris 75006   | France  | Protocol Version A<br>Amendment B<br>Amendment C | 11-JAN-10<br>20-SEP-10<br>01-FEB-11                                                                                                           |
| 201193 | Brigitte Dreno    | CPP IDF III          | Hôpital Tarnier-Cochin<br>89 rue d'Assas<br>Paris 75006   | France  | Protocol Version A<br>Amendment B<br>Amendment C | 11-JAN-10<br>20-SEP-10<br>01-FEB-11                                                                                                           |
| 202616 | Jean Jacques Grob | CPP IDF III          | Hôpital Tarnier-Cochin<br>89 rue d'Assas<br>Paris 75006   | France  | Protocol Version A<br>Amendment B<br>Amendment C | 15-MAR-10<br>20-SEP-10<br>01-FEB-10                                                                                                           |

vemurafenib (RO5185426) Roche Clinical Study Report - Protocol NO25026 -  
 Research Report 1039652 2624

# BRIM3 IRB List

## Names and Addresses of Institutional Review Boards / Ethics Committees and Actions

Protocol: NO25026

| CRTN   | INVESTIGATOR       | IRB/IEC Name                                                  | IRB/IEC Address                                                                                    | Country   | Approval Dates                                   | Date                                |
|--------|--------------------|---------------------------------------------------------------|----------------------------------------------------------------------------------------------------|-----------|--------------------------------------------------|-------------------------------------|
| 200978 | Victoria Atkinson  | Princess Alexandra Hospital Human Research Ethics Committee   | Level 2, Building 35<br>Princess Alexandra Hospital Ipswich Road<br>Woolloongabba, Queensland 4102 | Australia | Protocol Version A<br>Amendment B<br>Amendment C | 04-MAR-10<br>07-SEP-10<br>08-DEC-10 |
| 200981 | Fran Boyle         | Hunter New England Research Ethics Committee                  | Lookout Road<br>New Lambton, New South Wales<br>2305                                               | Australia | Protocol Version A<br>Amendment B<br>Amendment C | 09-DEC-09<br>29-SEP-10<br>02-DEC-10 |
| 201049 | Benjamin Brady     | Cabrini Human Research Ethics Committee                       | Cabrini Institute<br>183 Wattletree Road<br>Malvern, Victoria 3144                                 | Australia | Protocol Version A<br>Amendment B<br>Amendment C | 22-FEB-10<br>10-SEP-10<br>02-DEC-10 |
| 201213 | Melissa Eastgate   | RBWH Human Research Ethics Committee (HREC)                   | Level 7, Block 7<br>Royal Brisbane and Women's Hospital<br>Brisbane, Queensland 4006               | Australia | Protocol Version A<br>Amendment B<br>Amendment C | 03-MAR-10<br>05-AUG-10<br>30-NOV-10 |
| 201051 | Alexander Gumincki | Hunter New England Research Ethics Committee                  | Lookour Rd<br>New Lambton, New South Wales<br>2305                                                 | Australia | Protocol Version A<br>Amendment B<br>Amendment C | 09-DEC-09<br>29-SEP-10<br>02-DEC-10 |
| 201052 | Peter Hersey       | Hunter New England Research Ethics Committee                  | Lookout Road<br>New Lambton, New South Wales<br>2305                                               | Australia | Protocol Version A<br>Amendment B<br>Amendment C | 09-DEC-09<br>29-SEP-10<br>02-DEC-10 |
| 200990 | Rick Kefford       | Hunter New England Research Ethics Committee                  | Lookout Road<br>New Lambton, New South Wales<br>2305                                               | Australia | Protocol Version A<br>Amendment B<br>Amendment C | 09-DEC-09<br>29-SEP-10<br>02-DEC-10 |
| 201247 | Grant McArthur     | Peter MacCallum Cancer Centre Human Research Ethics Committee | Peter MacCallum Cancer Centre<br>St. Andrews Place<br>East Melbourne, Victoria 3002                | Australia | Protocol Version A<br>Amendment B<br>Amendment C | 18-FEB-10<br>04-AUG-10<br>02-DEC-10 |

verumafen/b (R05185428) Roche Clinical Study Report - Protocol NO25026 -  
 Research Report 1039652 2622



## BRIM3 IRB List

| CRTN   | INVESTIGATOR      | IRB/IEC Name                  | IRB/IEC Address                                                          | Country | Approval Dates                                   | Date                                |
|--------|-------------------|-------------------------------|--------------------------------------------------------------------------|---------|--------------------------------------------------|-------------------------------------|
| 201059 | Pascal Joly       | CPP IDF III                   | Hôpital Tarnier-Cochin<br>89 rue d'Assas<br>Paris 75006                  | France  | Protocol Version A<br>Amendment B<br>Amendment C | 11-JAN-10<br>20-SEP-10<br>01-FEB-11 |
| 201060 | Thomas Jouary     | CPP IDF III                   | Hôpital Tarnier-Cochin<br>89 rue d'Assas<br>Paris 75006                  | France  | Protocol Version A<br>Amendment B<br>Amendment C | 11-JAN-10<br>20-SEP-10<br>01-FEB-11 |
| 201061 | Celeste Lebbe     | CPP IDF III                   | Hôpital Tarnier-Cochin<br>89 rue d'Assas<br>Paris 75006                  | France  | Protocol Version A<br>Amendment B<br>Amendment C | 11-JAN-10<br>20-SEP-10<br>01-FEB-11 |
| 201185 | Laurent Mortier   | CPP IDF III                   | Hôpital Tarnier-Cochin<br>89 rue d'Assas<br>Paris 75006                  | France  | Protocol Version A<br>Amendment B<br>Amendment C | 11-JAN-10<br>20-SEP-10<br>01-FEB-11 |
| 201194 | Jean Paul Ortonne | CPP IDF III                   | Hôpital Tarnier-Cochin<br>89 rue d'Assas<br>Paris 75006                  | France  | Protocol Version A<br>Amendment B<br>Amendment C | 11-JAN-10<br>20-SEP-10<br>01-FEB-11 |
| 201186 | Caroline Robert   | CPP IDF III                   | Hôpital Tarnier-Cochin<br>89 rue d'Assas<br>Paris 75006                  | France  | Protocol Version A<br>Amendment B<br>Amendment C | 11-JAN-10<br>20-SEP-10<br>01-FEB-11 |
| 201187 | Luc Thomas        | CPP IDF III                   | Hôpital Tarnier-Cochin<br>89 rue d'Assas<br>Paris 75006                  | France  | Protocol Version A<br>Amendment B<br>Amendment C | 11-JAN-10<br>20-SEP-10<br>01-FEB-11 |
| 201197 | Carola Berking    | EC Med. Faculty CA University | Universitätsklinikum<br>Schwanenweg 20<br>Kiel, Schleswig Holstein 24105 | Germany | Protocol Version A<br>Amendment B<br>Amendment C | 17-FEB-10<br>12-AUG-10<br>14-FEB-11 |
| 201198 | Alexander Enk     | EC Med. Faculty CA University | Universitätsklinikum<br>Schwanenweg 20<br>Kiel, Schleswig Holstein 24105 | Germany | Protocol Version A<br>Amendment B<br>Amendment C | 17-FEB-10<br>12-AUG-10<br>14-FEB-11 |

## BRIM3 IRB List

| CRTN   | INVESTIGATOR     | IRB/IEC Name                  | IRB/IEC Address                                                          | Country | Approval Dates                                   | Date                                |
|--------|------------------|-------------------------------|--------------------------------------------------------------------------|---------|--------------------------------------------------|-------------------------------------|
| 201201 | Claus Garbe      | EC Med. Faculty CA University | Universitätsklinikum<br>Schwanenweg 20<br>Kiel, Schleswig Holstein 24105 | Germany | Protocol Version A<br>Amendment B<br>Amendment C | 17-FEB-10<br>12-AUG-10<br>14-FEB-11 |
| 201196 | Anja Gezierich   | EC Med. Faculty CA University | Universitätsklinikum<br>Schwanenweg 20<br>Kiel, Schleswig Holstein 24105 | Germany | Protocol Version A<br>Amendment B<br>Amendment C | 17-MAY-10<br>12-AUG-10<br>14-FEB-11 |
| 201064 | Ralf Gutzmer     | EC Med. Faculty CA University | Universitätsklinikum<br>Schwanenweg 20<br>Kiel, Schleswig Holstein 24105 | Germany | Protocol Version A<br>Amendment B<br>Amendment C | 17-FEB-10<br>12-AUG-10<br>14-FEB-11 |
| 203360 | Christian Hafner | EC Med. Faculty CA University | Universitätsklinikum<br>Schwanenweg 20<br>Kiel, Schleswig Holstein 24105 | Germany | Protocol Version A<br>Amendment B<br>Amendment C | 25-MAY-10<br>12-AUG-10<br>14-FEB-11 |
| 201065 | Axel Hauschild   | EC Med. Faculty CA University | Universitätsklinikum<br>Schwanenweg 20<br>Kiel, Schleswig Holstein 24105 | Germany | Protocol Version A<br>Amendment B<br>Amendment C | 17-FEB-10<br>12-AUG-10<br>14-FEB-11 |
| 203151 | Rudolf Herbst    | EC Med. Faculty CA University | Universitätsklinikum<br>Schwanenweg 20<br>Kiel, Schleswig Holstein 24105 | Germany | Protocol Version A<br>Amendment B<br>Amendment C | 25-MAY-10<br>12-AUG-10<br>14-FEB-11 |
| 201199 | Sabine Sell      | EC Med. Faculty CA University | Universitätsklinikum<br>Schwanenweg 20<br>Kiel, Schleswig Holstein 24105 | Germany | Protocol Version A<br>Amendment B<br>Amendment C | 17-FEB-10<br>12-AUG-10<br>14-FEB-11 |
| 201200 | Roland Kaufmann  | EC Med. Faculty CA University | Universitätsklinikum<br>Schwanenweg 20<br>Kiel, Schleswig Holstein 24105 | Germany | Protocol Version A<br>Amendment B<br>Amendment C | 17-FEB-10<br>12-AUG-10<br>14-FEB-11 |
| 201202 | Carmen Loqui     | EC Med. Faculty CA University | Universitätsklinikum<br>Schwanenweg 20<br>Kiel, Schleswig Holstein 24105 | Germany | Protocol Version A<br>Amendment B<br>Amendment C | 17-FEB-10<br>12-AUG-10<br>14-FEB-11 |

vemurafenib (RO5185426) Roche Clinical Study Report - Protocol NO25026 -  
 Research Report 1039652 2626

## BRIM3 IRB List

| CRTN   | INVESTIGATOR     | IRB/IEC Name                                           | IRB/IEC Address                                                                   | Country | Approval Dates                                   | Date                                |
|--------|------------------|--------------------------------------------------------|-----------------------------------------------------------------------------------|---------|--------------------------------------------------|-------------------------------------|
| 201203 | Cornelia Mauch   | EC Med. Faculty CA University                          | Universitaetsklinikum<br>Schwanenweg 20<br>Kiel, Schleswig Holstein 24105         | Germany | Protocol Version A<br>Amendment B<br>Amendment C | 17-FEB-10<br>12-AUG-10<br>14-FEB-11 |
| 201066 | Peter Mohr       | EC Med. Faculty CA University                          | Universitaetsklinikum<br>Schwanenweg 20<br>Kiel, Schleswig Holstein 24105         | Germany | Protocol Version A<br>Amendment B<br>Amendment C | 17-FEB-10<br>12-AUG-10<br>14-FEB-11 |
| 201204 | Dirk Schadendorf | EC Med. Faculty CA University                          | Universitaetsklinikum<br>Schwanenweg 20<br>Kiel, Schleswig Holstein 24105         | Germany | Protocol Version A<br>Amendment B<br>Amendment C | 17-FEB-10<br>12-AUG-10<br>14-FEB-11 |
| 201207 | Jan Simon        | EC Med. Faculty CA University                          | Universitaetsklinikum<br>Schwanenweg 20<br>Kiel, Schleswig Holstein 24105         | Germany | Protocol Version A<br>Amendment B<br>Amendment C | 17-FEB-10<br>12-AUG-10<br>14-FEB-11 |
| 201205 | Radolf Stadler   | EC Med. Faculty CA University                          | Universitaetsklinikum<br>Schwanenweg 20<br>Kiel, Schleswig Holstein 24105         | Germany | Protocol Version A<br>Amendment B<br>Amendment C | 17-FEB-10<br>12-AUG-10<br>14-FEB-11 |
| 201206 | Annette Stein    | EC Med. Faculty CA University                          | Universitaetsklinikum<br>Schwanenweg 20<br>Kiel, Schleswig Holstein 24105         | Germany | Protocol Version A<br>Amendment B<br>Amendment C | 17-FEB-10<br>12-AUG-10<br>14-FEB-11 |
| 201218 | Michal Lotem     | Hadassah Medical Organization<br>Helsinki Committee    | Kiryat Hadassah, p.o.b. 12000<br>Jerusalem 91120                                  | Israel  | Protocol Version A<br>Amendment B<br>Amendment C | 27-DEC-09<br>14-SEP-10<br>11-JAN-11 |
| 201056 | Ilan Ron         | Tel Aviv Sourasky Medical<br>Center Helsinki Committee | 6, Weizman st<br>Tel Aviv 64239                                                   | Israel  | Protocol Version A<br>Amendment B<br>Amendment C | 21-MAR-10<br>09-AUG-10<br>06-JAN-11 |
| 201219 | Jacob Schachter  | Chaim Sheba helsinki<br>Committee                      | Oncology Division<br>Chaim Sheba Medical Center<br>Tel Hashomer, Ramat Gan, 52621 | Israel  | Protocol Version A<br>Amendment B<br>Amendment C | 25-FEB-10<br>28-JUL-10<br>30-NOV-10 |

verurteilung (RO5185426) Roche Clinical Study Report - Protocol NO25026 -  
 Research Report 1039652 2627

## BRIM3 IRB List

| CRTN   | INVESTIGATOR        | IRB/IEC Name                                       | IRB/IEC Address                                     | Country | Approval Dates                                   | Date                                                       |
|--------|---------------------|----------------------------------------------------|-----------------------------------------------------|---------|--------------------------------------------------|------------------------------------------------------------|
| 201188 | Paolo Ascierto      | EC IROCS STUDIO E CURA DEI TUMORI GIOVANNI PASCALE | VIA MARIANO SEMMOLA Napoli 80131                    | Italy   | Protocol Version A<br>Amendment B<br>Amendment C | 04-FEB-10<br>29-SEP-10<br>Approval not received yet        |
| 201062 | Michele Del Vecchio | EC IROCS ISTITUTO NAZIONALE TUMORI                 | Via Giacomo Venezian, 1 Milano 20133                | Italy   | Protocol Version A<br>Amendment B<br>Amendment C | 23-FEB-10<br>25-NOV-10<br>Approval pending as of 04-MAR-11 |
| 204616 | Francesco Cognetti  | EC IFO - Istituti Fisioterapici Ospitalieri        | Via Elio Chianesi, 53 Roma 00144                    | Italy   | Protocol Version A<br>Amendment B<br>Amendment C | 19-JUL-10<br>19-JUL-10<br>17-JAN-11                        |
| 201190 | Michele Guida       | EC IROCS OSPEDALE ONCOLOGICO DI BARI               | Via S.F. Hahnemann , 10 Bari 70126                  | Italy   | Protocol Version A<br>Amendment B<br>Amendment C | 21-MAR-10<br>22-SEP-10<br>11-JAN-11                        |
| 201191 | Michele Maio        | EC AOU SENESE DI SIENA                             | c/o U.O.C. Farmacia AOUS - Viale Bracci Siena 53100 | Italy   | Protocol Version A<br>Amendment B<br>Amendment C | 21-DEC-09<br>15-SEP-10<br>16-DEC-10                        |
| 201063 | Paola Queirolo      | EC ISITUTO NAZIONALE RICERCA SUL CANCRO DI GENOVA  | L.go R. BENZI 10 Genova 16132                       | Italy   | Protocol Version A<br>Amendment B<br>Amendment C | 29-DEC-09<br>05-JUL-10<br>22-NOV-10                        |
| 202892 | Salvatore Siena     | EC Ospedale Niguarda Ca'Granda                     | P.zza Ospedale Maggiore 3 Milano 20162              | Italy   | Protocol Version A<br>Amendment B<br>Amendment C | 22-APR-10<br>16-SEP-10<br>28-JAN-11                        |
| 201192 | Alessandro Testori  | EC ISTITUTO EUROPEO DI ONCOLOGIA                   | via Ripamonti 435 Milano 20141                      | Italy   | Protocol Version A<br>Amendment B<br>Amendment C | 09-MAR-10<br>24-SEP-10<br>04-MAR-11                        |

## BRIM3 IRB List

| CRTN   | INVESTIGATOR               | IRB/IEC Name                                     | IRB/IEC Address                      | Country     | Approval Dates                                   | Date                                |
|--------|----------------------------|--------------------------------------------------|--------------------------------------|-------------|--------------------------------------------------|-------------------------------------|
| 201233 | J.B.A.G. Haanen            | NKI Protocol<br>Toetsingscommissie (Central)     | Plesmanlaan 121<br>Amsterdam 1066 CX | Netherlands | Protocol Version A<br>Amendment B<br>Amendment C | 08-FEB-10<br>16-AUG-10<br>26-JAN-11 |
| 202388 | G.A.P. Hospers             | NKI Protocol<br>Toetsingscommissie (Central)     | Plesmanlaan 121<br>Amsterdam 1066 CX | Netherlands | Protocol Version A<br>Amendment B<br>Amendment C | 08-FEB-10<br>16-AUG-10<br>26-JAN-11 |
| 201165 | A.J.M. Van den<br>Eertwegh | NKI Protocol<br>Toetsingscommissie (Central)     | Plesmanlaan 121<br>Amsterdam 1066 CX | Netherlands | Protocol Version A<br>Amendment B<br>Amendment C | 08-FEB-10<br>16-AUG-10<br>26-JAN-11 |
| 201246 | Catherine Barrow           | Multi- Region EC Committee                       | G/O Ministry of Health<br>Wellington | New Zealand | Protocol Version A<br>Amendment B<br>Amendment C | 24-MAR-10<br>01-SEP-10<br>10-DEC-10 |
| 201054 | Richard Isaacs             | Multi- Region EC Committee                       | G/O Ministry of Health<br>Wellington | New Zealand | Protocol Version A<br>Amendment B<br>Amendment C | 24-MAR-10<br>01-SEP-10<br>10-DEC-10 |
| 201215 | Chris Jackson              | Multi- Region EC Committee                       | G/O Ministry of Health<br>Wellington | New Zealand | Protocol Version A<br>Amendment B<br>Amendment C | 24-MAR-10<br>01-SEP-10<br>10-DEC-10 |
| 201055 | Michael Jameson            | Multi- Region EC Committee                       | G/O Ministry of Health<br>Wellington | New Zealand | Protocol Version A<br>Amendment B<br>Amendment C | 24-MAR-10<br>01-SEP-10<br>10-DEC-10 |
| 201216 | Mike McCrystal             | Multi- Region EC Committee                       | G/O Ministry of Health<br>Wellington | New Zealand | Protocol Version A<br>Amendment B<br>Amendment C | 24-MAR-10<br>01-SEP-10<br>10-DEC-10 |
| 201235 | Johan Hansson              | Regionala<br>Etikprövningsnämnden i<br>Stockholm | FE 289<br>Stockholm SE-171 77        | Sweden      | Protocol Version A<br>Amendment B<br>Amendment C | 20-JAN-10<br>14-SEP-10<br>16-NOV-10 |

## BRIM3 IRB List

venurafenib (RO5185426) Roche Clinical Study Report - Protocol N025026 -  
 Research Report 1039652 2630

| CRTN   | INVESTIGATOR      | IRB/IEC Name                                     | IRB/IEC Address                                                                            | Country           | Approval Dates                                   | Date                                |
|--------|-------------------|--------------------------------------------------|--------------------------------------------------------------------------------------------|-------------------|--------------------------------------------------|-------------------------------------|
| 201236 | Ingrid Ljuslinder | Regionala<br>Etikprövningsnämnden i<br>Stockholm | FE 289<br>Stockholm SE-171 77                                                              | Sweden            | Protocol Version A<br>Amendment B<br>Amendment C | 20-JAN-10<br>14-SEP-10<br>16-NOV-10 |
| 201250 | Lotta Lundgren    | Regionala<br>Etikprövningsnämnden i<br>Stockholm | FE 289<br>Stockholm SE-171 77                                                              | Sweden            | Protocol Version A<br>Amendment B<br>Amendment C | 20-JAN-10<br>14-SEP-10<br>16-NOV-10 |
| 201166 | Gunnar Wagenius   | Regionala<br>Etikprövningsnämnden i<br>Stockholm | FE 289<br>Stockholm SE-171 77                                                              | Sweden            | Protocol Version A<br>Amendment B<br>Amendment C | 20-JAN-10<br>14-SEP-10<br>16-NOV-10 |
| 201208 | Thomas Walz       | Regionala<br>Etikprövningsnämnden i<br>Stockholm | FE 289<br>Stockholm SE-171 77                                                              | Sweden            | Protocol Version A<br>Amendment B<br>Amendment C | 20-JAN-10<br>14-SEP-10<br>16-NOV-10 |
| 201249 | Reinhard Dummer   | KEK Zürich                                       | Sonneggstrasse 12<br>Zürich 8091                                                           | Switzerland       | Protocol Version A<br>Amendment B<br>Amendment C | 25-JAN-10<br>22-OCT-10<br>16-NOV-10 |
| 201220 | Olivier Michielin | EC Vaud                                          | rue du Bugnon 21<br>Lausanne 1011                                                          | Switzerland       | Protocol Version A<br>Amendment B<br>Amendment C | 12-APR-10<br>27-AUG-10<br>14-JAN-11 |
| 201238 | Ewan Brown        | South East London REC 2                          | Ethics Committee Office<br>Governor's Hall Suite, St Thomas'<br>Hospital<br>London SE1 7EH | United<br>Kingdom | Protocol Version A<br>Amendment B<br>Amendment C | 18-NOV-09<br>18-AUG-10<br>15-DEC-10 |
| 201209 | David Chao        | South East London REC 2                          | Ethics Committee Office<br>Governor's Hall Suite, St Thomas'<br>Hospital<br>London SE1 7EH | United<br>Kingdom | Protocol Version A<br>Amendment B<br>Amendment C | 18-NOV-09<br>18-AUG-10<br>15-DEC-10 |
| 201210 | Pippa Corrie      | South East London REC 2                          | Ethics Committee Office<br>Governor's Hall Suite, St Thomas'<br>Hospital<br>London SE1 7EH | United<br>Kingdom | Protocol Version A<br>Amendment B<br>Amendment C | 18-NOV-09<br>18-AUG-10<br>15-DEC-10 |

## BRIM3 IRB List

| CRIN   | INVESTIGATOR          | IRB/TEC Name            | IRB/TEC Address                                                                            | Country           | Approval Dates                                   | Date                                |
|--------|-----------------------|-------------------------|--------------------------------------------------------------------------------------------|-------------------|--------------------------------------------------|-------------------------------------|
| 201232 | Jeff Evans            | South East London REC 2 | Ethics Committee Office<br>Governor's Hall Suite, St Thomas'<br>Hospital<br>London SE1 7EH | United<br>Kingdom | Protocol Version A<br>Amendment B<br>Amendment C | 18-NOV-09<br>18-AUG-10<br>15-DEC-10 |
| 201237 | Mark Harries          | South East London REC 2 | Ethics Committee Office<br>Governor's Hall Suite, St Thomas'<br>Hospital<br>London SE1 7EH | United<br>Kingdom | Protocol Version A<br>Amendment B<br>Amendment C | 18-NOV-09<br>18-AUG-10<br>15-DEC-10 |
| 202938 | James Larkin          | South East London REC 2 | Ethics Committee Office<br>Governor's Hall Suite, St Thomas'<br>Hospital<br>London SE1 7EH | United<br>Kingdom | Protocol Version A<br>Amendment B<br>Amendment C | 18-NOV-09<br>18-AUG-10<br>15-DEC-10 |
| 201239 | James Larkin          | South East London REC 2 | Ethics Committee Office<br>Governor's Hall Suite, St Thomas'<br>Hospital<br>London SE1 7EH | United<br>Kingdom | Protocol Version A<br>Amendment B<br>Amendment C | 18-NOV-09<br>18-AUG-10<br>15-DEC-10 |
| 201240 | Paul Lorigan          | South East London REC 2 | Ethics Committee Office<br>Governor's Hall Suite, St Thomas'<br>Hospital<br>London SE1 7EH | United<br>Kingdom | Protocol Version A<br>Amendment B<br>Amendment C | 18-NOV-09<br>18-AUG-10<br>15-DEC-10 |
| 201211 | Mark Middleton        | South East London REC 2 | Ethics Committee Office<br>Governor's Hall Suite, St Thomas'<br>Hospital<br>London SE1 7EH | United<br>Kingdom | Protocol Version A<br>Amendment B<br>Amendment C | 18-NOV-09<br>18-AUG-10<br>15-DEC-10 |
| 201212 | Paul Nathan           | South East London REC 2 | Ethics Committee Office<br>Governor's Hall Suite, St Thomas'<br>Hospital<br>London SE1 7EH | United<br>Kingdom | Protocol Version A<br>Amendment B<br>Amendment C | 18-NOV-09<br>18-AUG-10<br>15-DEC-10 |
| 201241 | Christian Ottensmeier | South East London REC 2 | Ethics Committee Office<br>Governor's Hall Suite, St Thomas'<br>Hospital<br>London SE1 7EH | United<br>Kingdom | Protocol Version A<br>Amendment B<br>Amendment C | 18-NOV-09<br>18-AUG-10<br>15-DEC-10 |

## BRIM3 IRB List

| CRTN   | INVESTIGATOR             | IRB/IEC Name                                                                             | IRB/IEC Address                                                                            | Country           | Approval Dates                                   | Date                                |
|--------|--------------------------|------------------------------------------------------------------------------------------|--------------------------------------------------------------------------------------------|-------------------|--------------------------------------------------|-------------------------------------|
| 201242 | Poulam Patel             | South East London REC 2                                                                  | Ethics Committee Office<br>Governor's Hall Suite, St Thomas'<br>Hospital<br>London SE1 7EH | United<br>Kingdom | Protocol Version A<br>Amendment B<br>Amendment C | 18-NOV-09<br>18-AUG-10<br>15-DEC-10 |
| 203236 | Ruth Phummer             | South East London REC 2                                                                  | Ethics Committee Office<br>Governor's Hall Suite, St Thomas'<br>Hospital<br>London SE1 7EH | United<br>Kingdom | Protocol Version A<br>Amendment B<br>Amendment C | 18-NOV-09<br>18-AUG-10<br>15-DEC-10 |
| 203183 | John Wagstaff            | South East London REC 2                                                                  | Ethics Committee Office<br>Governor's Hall Suite, St Thomas'<br>Hospital<br>London SE1 7EH | United<br>Kingdom | Protocol Version A<br>Amendment B<br>Amendment C | 18-NOV-09<br>18-AUG-10<br>15-DEC-10 |
| 202384 | Virginia<br>Wolstenholme | South East London REC 2                                                                  | Ethics Committee Office<br>Governor's Hall Suite, St Thomas'<br>Hospital<br>London SE1 7EH | United<br>Kingdom | Protocol Version A<br>Amendment B<br>Amendment C | 18-NOV-09<br>18-AUG-10<br>15-DEC-10 |
| 203149 | Wallace Akerley          | Huntsman Cancer Institute at<br>University of Utah - IRB                                 | 75 South 2000 East, # 111<br>Salt Lake City, UT. 84112                                     | USA               | Protocol Version A<br>Amendment B<br>Amendment C | 12-MAY-10<br>13-OCT-10<br>09-FEB-11 |
| 201156 | Paul Chapman             | Memorial Sloan-Kettering<br>Cancer Center IRB/Privacy<br>Board                           | 1275 York Avenue<br>New York, NY. 10021                                                    | USA               | Protocol Version A<br>Amendment B<br>Amendment C | 26-JAN-10<br>11-AUG-10<br>22-FEB-11 |
| 200992 | Fran Collichio           | The University of North<br>Carolina at Chapel Hill<br>Office of Human Research<br>Ethics | Medical School Building 52<br>Mason Farm Road<br>CB #7097<br>Chapel Hill, NC. 27599-7097   | USA               | Protocol Version A<br>Amendment B<br>Amendment C | 01-MAR-10<br>13-AUG-10<br>07-JAN-11 |
| 202618 | Robert Conry             | WIRB                                                                                     | 3535 Seventh Ave, SW<br>Olympia, WA. 98508                                                 | USA               | Protocol Version A<br>Amendment B<br>Amendment C | 30-MAR-10<br>18-AUG-10<br>21-DEC-10 |

Vennartafentib (RO5185428) Roche Clinical Study Report - Protocol NO25028 -  
 Research Report 1039652 2632



# BRIM3 IRB List

| CRTN   | INVESTIGATOR                    | IRB/IEC Name                                               | IRB/IEC Address                                                                            | Country | Approval Dates                                   | Date                                                             |
|--------|---------------------------------|------------------------------------------------------------|--------------------------------------------------------------------------------------------|---------|--------------------------------------------------|------------------------------------------------------------------|
| 200993 | Lee Cramer                      | WIRB                                                       | 3535 Seventh Ave. SW<br>Olympia, WA. 98508                                                 | USA     | Protocol Version A<br>Amendment B<br>Amendment C | 20-APR-10<br>24-AUG-10<br>20-DEC-10                              |
| 201000 | Brendan Curti                   | Providence Health & Services<br>Institutional Review Board | 5251 NE Glisan St<br>Building A – 3 <sup>rd</sup> Floor<br>Portland, OR. 97213             | USA     | Protocol Version A<br>Amendment B<br>Amendment C | 06-MAY-10<br>28-SEP-10<br>24-JAN-11                              |
| 202622 | Keith Flaherty (Beth<br>Israel) | Office for Human Research<br>Studies                       | Dana Farber Cancer Institute<br>20 Overland St, 2 <sup>nd</sup> Floor<br>Boston, MA. 02115 | USA     | Protocol Version A<br>Amendment B<br>Amendment C | 11-JAN-10<br>29-NOV-10<br>22-FEB-11                              |
| 202623 | Keith Flaherty (Dana<br>Farber) | Office for Human Research<br>Studies                       | Dana Farber Cancer Institute<br>20 Overland St, 2 <sup>nd</sup> Floor<br>Boston, MA. 02115 | USA     | Protocol Version A<br>Amendment B<br>Amendment C | 11-JAN-10<br>29-NOV-10<br>22-FEB-11                              |
| 200968 | Keith Flaherty (Mass<br>Gen)    | Office for Human Research<br>Studies                       | Dana Farber Cancer Institute<br>20 Overland St, 2 <sup>nd</sup> Floor<br>Boston, MA. 02115 | USA     | Protocol Version A<br>Amendment B<br>Amendment C | 11-JAN-10<br>29-NOV-10<br>22-FEB-11                              |
| 200994 | Lawrence Flaherty               | Human Investigation Committee                              | 101 E. Alexandrine<br>Detroit, MI. 48201                                                   | USA     | Protocol Version A<br>Amendment B<br>Amendment C | 22-APR-10<br>23-SEP-10<br>24-JAN-11                              |
| 201182 | Rene Gonzalez                   | WIRB                                                       | 3535 Seventh Ave. SW<br>Olympia, WA. 98508                                                 | USA     | Protocol Version A<br>Amendment B<br>Amendment C | 27-APR-10<br>14-SEP-10<br>28-DEC-10                              |
| 201248 | John Hainsworth                 | WIRB                                                       | 3535 Seventh Ave<br>PO Box 12029<br>Olympia, WA. 98502                                     | USA     | Protocol Version A<br>Amendment B<br>Amendment C | 29-DEC-09<br>10-AUG-10<br>Approval<br>pending as of<br>04-MAR-11 |
| 201158 | Thomas Hutson                   | Copernicus Group IRB                                       | One Triangle Drive, Suite 100<br>Research Triangle Park, NC.                               | USA     | Protocol Version A<br>Amendment B<br>Amendment C | 27-OCT-09<br>07-JUL-10<br>17-NOV-10                              |

venurafenib (RO5185428) Roche Clinical Study Report - Protocol NO25028 -  
 Research Report 1039652 2633

## BRIM3 IRB List

venurafenib (RO5185426) Roche Clinical Study Report - Protocol NO25026 -  
Research Report 1039652 2634

| CRTN   | INVESTIGATOR     | IRB/IEC Name                                    | IRB/IEC Address                                                                    | Country | Approval Dates                                   | Date                                                                                                                                   |
|--------|------------------|-------------------------------------------------|------------------------------------------------------------------------------------|---------|--------------------------------------------------|----------------------------------------------------------------------------------------------------------------------------------------|
| 201159 | David Lawson     | WIRB                                            | 3535 Seventh Ave, SW<br>Olympia, WA. 98508                                         | USA     | Protocol Version A<br>Amendment B<br>Amendment C | 27-APR-10<br>31-AUG-10<br>07-DEC-10                                                                                                    |
| 200995 | Gerald Linette   | Washington University School<br>of Medicine IRB | 660 South Euclid Ave<br>Campus Box 8089<br>St. Louis, MO. 63110                    | USA     | Protocol Version A<br>Amendment B<br>Amendment C | 09-MAR-10<br>28-SEP-10<br>Approved by<br>IRB but<br>approval letter<br>contained an<br>error and site is<br>working with<br>IRB to fix |
| 200996 | Theodore Logan   | IUPUI IRB                                       | 618 Union Building<br>620 Union Drive<br>Indianapolis, IN. 46202                   | USA     | Protocol Version A<br>Amendment B<br>Amendment C | 15-JAN-10<br>31-AUG-10<br>11-JAN-11                                                                                                    |
| 200997 | Kim Margolin     | WIRB                                            | 3535 Seventh Ave, SW<br>Olympia, WA. 98508                                         | USA     | Protocol Version A<br>Amendment B<br>Amendment C | 02-FEB-10<br>18-AUG-10<br>28-DEC-10                                                                                                    |
| 200967 | Stergios Moschos | Copernicus Group IRB                            | One Triangle Drive, Suite 100<br>Research Triangle Park, NC.                       | USA     | Protocol Version A<br>Amendment B<br>Amendment C | 10-FEB-10<br>07-JUL-10<br>17-NOV-10                                                                                                    |
| 200998 | Steven O'Day     | Copernicus Group IRB                            | One Triangle Drive, Suite 100<br>Research Triangle Park, NC.<br>27709              | USA     | Protocol Version A<br>Amendment B<br>Amendment C | 27-OCT-09<br>07-JUL-10<br>17-NOV-10                                                                                                    |
| 200969 | Anna Pavlick     | NYU Medical Center IRB                          | 550 First Avenue<br># VET 10 <sup>th</sup> Floor, West Wing<br>New York, NY. 10016 | USA     | Protocol Version A<br>Amendment B<br>Amendment C | 22-FEB-10<br>28-SEP-10<br>22-FEB-11                                                                                                    |

## BRIM3 IRB List

| CRTN   | INVESTIGATOR   | IRB/IEC Name                                            | IRB/IEC Address                                                    | Country | Approval Dates                                   | Date                                                             |
|--------|----------------|---------------------------------------------------------|--------------------------------------------------------------------|---------|--------------------------------------------------|------------------------------------------------------------------|
| 200970 | Antoni Ribas   | Office for Protection of Research Studies               | 11000 Kinross Ave, Suite 102<br>Los Angeles, CA. 90095             | USA     | Protocol Version A<br>Amendment B<br>Amendment C | 21-JAN-10<br>12-OCT-10<br>14-JAN-11                              |
| 200971 | Lynn Schuchter | U of Pennsylvania IRB                                   | 3624 Market St, Ste 301S<br>Philadelphia, PA. 19104-6006           | USA     | Protocol Version A<br>Amendment B<br>Amendment C | 07-MAY-10<br>13-SEP-10<br>26-JAN-11                              |
| 200991 | Jeffrey Sosman | Vanderbilt University IRB                               | 1313 21st Avenue South<br>504 Oxford House<br>Nashville, TN. 37232 | USA     | Protocol Version A<br>Amendment B<br>Amendment C | 11-FEB-10<br>07-OCT-10<br>Approval<br>pending as of<br>04-MAR-11 |
| 200999 | Lynn Spidler   | St. Mary's Medical Center<br>Institutional Review Board | 450 Stanyan St<br>San Francisco, CA. 94117                         | USA     | Protocol Version A<br>Amendment B<br>Amendment C | 27-JAN-10<br>31-AUG-10<br>19-JAN-11                              |

vemurafenib (RO5185426) Roche Clinical Study Report - Protocol N025026 -  
 Research Report 1039652 2635

# BRIM 7 IRB List

## ETHICS AND IRB DETAILS

| IRB/IEC Name                                       | central / local | Chairman              | Address                                                                                                                           | Country | CRTN(s)         | Action               | Date       |
|----------------------------------------------------|-----------------|-----------------------|-----------------------------------------------------------------------------------------------------------------------------------|---------|-----------------|----------------------|------------|
| Mount Zion Panel                                   | Local           | Andrew Parsa          | Committee of Human Research Office of Research 3333 California Street, Suite 315 University of California San Francisco, CA 94118 | USA     | 206577/Daud     | Amendment F Approval | 9/12/2012  |
|                                                    |                 |                       |                                                                                                                                   |         |                 | Amendment E Approval | 2/14/2012  |
|                                                    |                 |                       |                                                                                                                                   |         |                 | Amendment D Approval | 9/13/2011  |
|                                                    |                 |                       |                                                                                                                                   |         |                 | Amendment C Approval | 7/12/2011  |
|                                                    |                 |                       |                                                                                                                                   |         |                 | Amendment B Approval | 3/21/2011  |
| Wayne Statue University Institutional Review Board | Local           | James E. Puklin       | Wayne State University 87 East Canfield, Second Floor Detroit, MI 48201                                                           | USA     | 245655/Flaherty | Amendment F Approval | 8/24/2012  |
|                                                    |                 |                       |                                                                                                                                   |         |                 | Amendment E Approval | 5/4/2012   |
| University of Chicago Institutional Review Board   | Local           | Christopher Daugherty | University of Chicago McGiffert Hall, 2nd Floor 5751 S. Woodlawn Ave. Chicago, IL 60637                                           | USA     | 206579/Gajewski | Amendment F Approval | 10/10/2012 |
|                                                    |                 |                       |                                                                                                                                   |         |                 | Amendment E Approval | 2/21/2012  |
|                                                    |                 |                       |                                                                                                                                   |         |                 | Amendment D Approval | 9/14/2011  |
|                                                    |                 |                       |                                                                                                                                   |         |                 | Amendment C Approval | 5/25/2011  |
|                                                    |                 |                       |                                                                                                                                   |         |                 | Amendment B Approval | 2/25/2011  |

(RO5514041) Roche Clinical Study Report - Protocol NO25395 - Research Report  
1057300 6476

## BRIM 7 IRB List

|                                                               |         |                     |                                                                                                                       |     |                 |                                    |
|---------------------------------------------------------------|---------|---------------------|-----------------------------------------------------------------------------------------------------------------------|-----|-----------------|------------------------------------|
| Western Institutional Review Board                            | Central | Theodore D. Schultz | Western Institutional Review Board<br>3535 Seventh Avenue SW<br>Olympia, WA<br>98502-5010                             | USA | 206321/Gonzalez | Amendment 8/31/2012<br>F Approval  |
|                                                               |         |                     |                                                                                                                       |     |                 | Amendment 1/13/2012<br>E Approval  |
|                                                               |         |                     |                                                                                                                       |     |                 | Amendment 8/19/2011<br>D Approval  |
|                                                               |         |                     |                                                                                                                       |     |                 | Amendment 4/25/2011<br>C Approval  |
|                                                               |         |                     |                                                                                                                       |     |                 | Amendment 1/3/2011<br>B Approval   |
| Western Institutional Review Board                            | Central | Theodore D. Schultz | Western Institutional Review Board<br>3535 Seventh Avenue SW<br>Olympia, WA<br>98502-5010                             | USA | 240937/Hamid    | Amendment 9/28/2012<br>F Approval  |
|                                                               |         |                     |                                                                                                                       |     |                 | Amendment 1/20/2012<br>E Approval  |
|                                                               |         |                     |                                                                                                                       |     |                 | Amendment 12/16/2011<br>D Approval |
|                                                               |         |                     |                                                                                                                       |     |                 | Amendment 12/16/2011<br>C Approval |
| Indiana University Institutional Review Board                 | Local   | N. Manchanda        | Indiana University Office of Research Administration<br>980 Indiana Ave, Room 3315<br>Indianapolis, IN<br>46202-29215 | USA | 241099/Logan    | Amendment 9/27/2012<br>F Approval  |
|                                                               |         |                     |                                                                                                                       |     |                 | Amendment 4/25/2012<br>E Approval  |
| Peter MacCallum Cancer Centre Human Research Ethics Committee | Local   | Dianne Snowden      | Peter MacCallum Cancer Centre<br>St Andrews Place East<br>Melbourne, VIC<br>3002 Australia                            | AUS | 206325/McArthur | Amendment 9/21/2012<br>F Approval  |
|                                                               |         | Namita Mazzitelli   |                                                                                                                       |     |                 | Amendment 3/7/2012<br>E Approval   |
|                                                               |         | Sharon Reid         |                                                                                                                       |     |                 | Amendment 9/16/2011<br>D Approval  |
|                                                               |         | Dianne Snowden      |                                                                                                                       |     |                 | Amendment 5/6/2011<br>C Approval   |

(RO5514041) Roche Clinical Study Report - Protocol NO25395 - Research Report  
1057300 6477

## BRIM 7 IRB List

|                                                   |       |                    |                                                                                                                   |     |                |                                   |
|---------------------------------------------------|-------|--------------------|-------------------------------------------------------------------------------------------------------------------|-----|----------------|-----------------------------------|
| NYU School of Medicine Institutional Review Board | Local | Elan Czeisler      | NYU School of Medicine 550 First Avenue New York, NY 10016                                                        | USA | 206324/Pavlick | Amendment 9/25/2012<br>F Approval |
|                                                   |       |                    |                                                                                                                   |     |                | Amendment 2/15/2012<br>E Approval |
|                                                   |       |                    |                                                                                                                   |     |                | Amendment 8/30/2011<br>D Approval |
|                                                   |       |                    |                                                                                                                   |     |                | Amendment 5/25/2011<br>C Approval |
|                                                   |       |                    |                                                                                                                   |     |                | Amendment 2/3/2011<br>B Approval  |
| Vanderbilt University Institutional Review Board  | Local | Steven L. Goudy    | Vanderbilt University Institutional Review Board 1313 21st Avenue South 504 Oxford House Nashville, TN 37232-4315 | USA | 206319/Puzanov | Amendment 9/25/2012<br>F Approval |
|                                                   |       |                    |                                                                                                                   |     |                | Amendment 2/22/2012<br>E Approval |
|                                                   |       |                    |                                                                                                                   |     |                | Amendment 8/26/2011<br>D Approval |
|                                                   |       |                    |                                                                                                                   |     |                | Amendment 7/13/2011<br>C Approval |
|                                                   |       |                    |                                                                                                                   |     |                | Amendment 5/6/2011<br>B Approval  |
| Office of the Human Research Protection Program   | Local | Fairooz Kabbinavar | Office of the Human Research Protection Program 11000 Kinross Avenue Los Angeles, CA 90095                        | USA | 206318/Ribas   | Amendment 9/28/2012<br>F Approval |
|                                                   |       |                    |                                                                                                                   |     |                | Amendment 2/14/2012<br>E Approval |
|                                                   |       |                    |                                                                                                                   |     |                | Amendment 8/5/2011<br>D Approval  |
|                                                   |       |                    |                                                                                                                   |     |                | Amendment 5/19/2011<br>C Approval |
|                                                   |       |                    |                                                                                                                   |     |                | Amendment 2/4/2011<br>B Approval  |

(RO5514041) Roche Clinical Study Report - Protocol NO25395 - Research Report  
1057300 6478

# coBRIM IRB List

## Listing and Details of Ethics Committees and Investigational Review Boards for Study GO28141

| CRT No. | EC/IRB                                                                                | Address                                                                                                               |
|---------|---------------------------------------------------------------------------------------|-----------------------------------------------------------------------------------------------------------------------|
| 252958  | Royal Brisbane and Women's HREC                                                       | Royal Brisbane and Women's Hospital, Butterfield Street, Herston, QLD, 4029, Australia                                |
| 255130  | Greenslopes Reseach and Ethics Committee                                              | Greenslopes Private Hospital, Newdegate Street, Greenslopes, QLD, 4120, Australia                                     |
| 255084  | Royal Perth HREC                                                                      | Level 5, Colonial House, Royal Perth Hospital, Wellington Street, Perth, 6000, Australia                              |
| 254430  | Royal Brisbane and Women's HREC                                                       | Royal Brisbane and Women's Hospital, Butterfield Street, Herston, QLD, 4029, Australia                                |
| 252561  | Royal Adelaide Hospital HREC                                                          | Level 3, Hanson Institute IMVS Building, North Terrace, Adelaide, SA, 5000, Australia                                 |
| 252821  | Royal Brisbane and Women's HREC                                                       | Royal Brisbane and Women's Hospital, Butterfield Street, Herston, QLD, 4029, Australia                                |
| 253468  | Royal Brisbane and Women's HREC                                                       | Royal Brisbane and Women's Hospital, Butterfield Street, Herston, QLD, 4029, Australia                                |
| 252750  | Royal Brisbane and Women's HREC                                                       | Royal Brisbane and Women's Hospital, Butterfield Street, Herston, QLD, 4029, Australia                                |
| 252819  | Tasmania Health and Medical HREC                                                      | 301 Sandy Bay Campus, Office of Reseach Services, University of Tasmania, Private Bag 01, Hobart, TAS 7001, Australia |
| 252892  | Alfred Hospital EC                                                                    | The Alfred Hospital, Ground Floor, Lina Pavilion, Commercial Road, Melbourne, VIC, 3004, Australia                    |
| 252736  | Bellberry HREC                                                                        | 229 Greenhill Road, Dulwich, SA, 5065, Australia                                                                      |
| 252814  | HREC of Northern Territory Department of Health and Menzies School of Health Research | Royal Darwin Hospital Campus, Building 58, John Mathews Building, Rocklands Drive, Casuarina, NT, 0810, Australia     |
| 252824  | Bellberry HREC                                                                        | 229 Greenhill Road, Dulwich, SA, 5065, Australia                                                                      |
| 252735  | Royal Brisbane and Women's HREC                                                       | Royal Brisbane and Women's Hospital, Butterfield Street, Herston, QLD, 4029, Australia                                |
| 252752  | Royal Brisbane and Women's HREC                                                       | Royal Brisbane and Women's Hospital, Butterfield Street, Herston, QLD, 4029, Australia                                |
| 252818  | Tasmania Health and Medical HREC                                                      | 301 Sandy Bay Road, Office of Reseach Services, University of Tasmania, Private Bag 01, Hobart, TAS 7001, Australia   |
| 253466  | Bellberry HREC                                                                        | 229 Greenhill Road, Dulwich, SA, 5065, Australia                                                                      |
| 254367  | EC Oberösterreich                                                                     | Wager-Jauregg Weg15, 4020 Linz                                                                                        |
| 256316  | EC Niederösterreich                                                                   | Landhausplatz 1, Haus 15B                                                                                             |
| 254366  | CEC Vienna, Medical University Vienna                                                 | Borschkegasse 8b/E 06, 1090 Vienna                                                                                    |
| 255129  | EC Krankenhaus Elisabethinen                                                          | Fadingenstrasse 1, 4020 Linz                                                                                          |
| 256317  | EC Salzburg                                                                           | Seabstein-Stief Gasse 2, 5010 Salzburg                                                                                |
| 255077  | Commission d'Ethique Biomédicale Hospital-Facultaire de l'UCL                         | Avenue Hippocrate 55.14, Tour Harvey-Niveau 0 1200 Bruxelles Belgium                                                  |
| 254421  | Medische Commissie H.Hartziekenhuis Roeselare Menen vzw                               | Wijlenstraat 28800 Roeselare Belgium                                                                                  |
| 254432  | Comité d'Ethique de l'Institut Jules Bordet                                           | Secrétariat de Chimiothérapie Boulevard de Waterloo 125 (3ième étage) 1000 Bruxelles Belgium                          |

# coBRIM IRB List

| CRT No. | EC/IRB                                                       | Address                                                                                          |
|---------|--------------------------------------------------------------|--------------------------------------------------------------------------------------------------|
| 254362  | Ethische Toetsingcommissie (ETC)                             | Stadsomvaart 11 3500 Hasselt Belgium                                                             |
| 255076  | Comité d'Éthique Hospitalo-Facultaire Universitaire de Liège | Domaine Universitaire du Sart Tilman, Bâtiment B35, Avenue de l'Hôpital 1 4000 Liège Belgium     |
| 253610  | Ethisch Comité                                               | Universitair Ziekenhuis Antwerpen Wilrijkstraat 10 2650 Edegem Belgium                           |
| 254365  | Ethisch Comité AZ Groeninge                                  | Algemeen Ziekenhuis Groeninge, campus Maria's Voorzienigheid Loofstraat 43 8500 Kortrijk Belgium |
| 256864  | UBC BC Cancer Agency REB                                     | Fairmont Medical Building, 750 West Broadway, Suite 902 Vancouver, B.C. Canada V5Z 1H8           |
| 256315  | Comité d'éthique de la recherche du CHUQ                     | Hôpital Saint-François d'Assise<br>10, rue de L'Espinau, Local A0-124<br>Québec (Québec) G1L 3L5 |
| 256298  | Ontario Cancer Research Ethics Board                         | MaRS Centre, South Tower, Suite 800<br>101 College Street Toronto, Ontario, Canada M5G 0A3       |
| 256831  | Ontario Cancer Research Ethics Board                         | MaRS Centre, South Tower, Suite 800<br>101 College Street Toronto, Ontario, Canada M5G 0A3       |
| 254358  | Hamilton Integrated Research Ethics Board                    | 293 Wellington Street North, Suite 102<br>Hamilton ON L8L 8E7                                    |
| 254355  | McGill IRB                                                   | 3655 Promenade Sir William Osler, # 633<br>Montreal, Quebec<br>Canada H3G 1Y6                    |
| 256302  | Ontario Cancer Research Ethics Board                         | MaRS Centre, South Tower, Suite 800<br>101 College Street Toronto, Ontario, Canada M5G 0A3       |
| 261705  | UBC BC Cancer Agency REB                                     | Fairmont Medical Building, 750 West Broadway, Suite 902<br>Vancouver, B.C. Canada V5Z 1H8        |
| 254357  | Ottawa Hospital Research Ethics Board                        | MaRS Centre, South Tower, Suite 800<br>101 College Street Toronto, Ontario, Canada M5G 0A3       |
| 254368  | Ethická komise Fakultní nemocnice Královské Vinohrady        | Srobarova 50<br>100 34, Praha 10, Czech Rep.                                                     |
| 254372  | Ethická komise Nemocnice Na Bulovce                          | Budinova 2<br>180 01 Praha 8, Czech Rep.                                                         |
| 252747  | Ethická komise Všeobecné fakultní nemocnice v Praze          | Na Bojišti 1<br>128 08 Praha 2, Czech Rep.                                                       |
| 254375  | Ethická komise Fakultní nemocnice Hradec Králové             | Sokolova 581<br>500 05 Hradec Králové, Czech Rep.                                                |
| 252748  | Ethická nemocnice Fakultní nemocnice Olomouc a LF UP         | I.P. Pavlova 6<br>775 20 Olomouc, Czech Rep.                                                     |
| 252749  | Ethická komise Masarykova onkologického ústavu               | Zluty kopec 7<br>656 53 Brno, Czech Rep.                                                         |
| 254426  | Ethická komise Fakultní nemocnice v Motole                   | V Uvalu 84<br>150 06 Praha 5, Czech Rep.                                                         |
| 255124  | Ethická komise Pardubická krajská nemocnice, a.s.            | Kyjevská 44<br>532 03, Pardubice, Czech Rep.                                                     |

cobrimeritrb (R05514-041) Roche Clinical Study Report - Protocol G028141 -  
 Research Report 1060643 7485



# coBRIM IRB List

| CRT No. | EC/IRB                                  | Address                                                                                               |
|---------|-----------------------------------------|-------------------------------------------------------------------------------------------------------|
| 254904  | Etdka komise Fakultní nemocnice Ostrava | 17. listopadu<br>708 52 Ostrava, Czech Rep.                                                           |
| 257887  | CPP Ouest 3                             | CHU La Militerie, Pavillon le Blaye-Porte 9,<br>2 rue de la Militerie- BP 577<br>86021 Poitiers Cedex |
| 257517  | CPP Ouest 3                             | CHU La Militerie, Pavillon le Blaye-Porte 9,<br>2 rue de la Militerie- BP 577<br>86021 Poitiers Cedex |
| 254361  | CPP Ouest 3                             | CHU La Militerie, Pavillon le Blaye-Porte 9,<br>2 rue de la Militerie- BP 577<br>86021 Poitiers Cedex |
| 265143  | CPP Ouest 3                             | CHU La Militerie, Pavillon le Blaye-Porte 9,<br>2 rue de la Militerie- BP 577<br>86021 Poitiers Cedex |
| 255075  | CPP Ouest 3                             | CHU La Militerie, Pavillon le Blaye-Porte 9,<br>2 rue de la Militerie- BP 577<br>86021 Poitiers Cedex |
| 252623  | CPP Ouest 3                             | CHU La Militerie, Pavillon le Blaye-Porte 9,<br>2 rue de la Militerie- BP 577<br>86021 Poitiers Cedex |
| 253581  | CPP Ouest 3                             | CHU La Militerie, Pavillon le Blaye-Porte 9,<br>2 rue de la Militerie- BP 577<br>86021 Poitiers Cedex |
| 257505  | CPP Ouest 3                             | CHU La Militerie, Pavillon le Blaye-Porte 9,<br>2 rue de la Militerie- BP 577<br>86021 Poitiers Cedex |
| 252555  | CPP Ouest 3                             | CHU La Militerie, Pavillon le Blaye-Porte 9,<br>2 rue de la Militerie- BP 577<br>86021 Poitiers Cedex |
| 257502  | CPP Ouest 3                             | CHU La Militerie, Pavillon le Blaye-Porte 9,<br>2 rue de la Militerie- BP 577<br>86021 Poitiers Cedex |
| 256322  | CPP Ouest 3                             | CHU La Militerie, Pavillon le Blaye-Porte 9,<br>2 rue de la Militerie- BP 577<br>86021 Poitiers Cedex |
| 254902  | CPP Ouest 3                             | CHU La Militerie, Pavillon le Blaye-Porte 9,<br>2 rue de la Militerie- BP 577<br>86021 Poitiers Cedex |
| 258211  | CPP Ouest 3                             | CHU La Militerie, Pavillon le Blaye-Porte 9,<br>2 rue de la Militerie- BP 577<br>86021 Poitiers Cedex |

coBRIM (RO5514/041) Roche Clinical Study Report - Protocol G028141 -  
 Research Report 1090643 7496

# coBRIM IRB List

| CRT No. | EC/IRB                                                                                                             | Address                                                                                       |
|---------|--------------------------------------------------------------------------------------------------------------------|-----------------------------------------------------------------------------------------------|
| 255863  | CPP Ouest 3                                                                                                        | CHU La Milétrie, Pavillon le Blaye-Porte 9, 2 rue de la Milétrie- BP 577 86021 Poitiers Cedex |
| 252559  | CPP Ouest 3                                                                                                        | CHU La Milétrie, Pavillon le Blaye-Porte 9, 2 rue de la Milétrie- BP 577 86021 Poitiers Cedex |
| 256325  | Ethik-Kommission an der Medizinischen Fakultät der Eberhard-Karls-Universität und am Universitätsklinikum Tübingen | Gartenstr. 47<br>72074 Tübingen                                                               |
| 254412  | Ethik-Kommission an der Medizinischen Fakultät der Eberhard-Karls-Universität und am Universitätsklinikum Tübingen | Gartenstr. 47<br>72074 Tübingen                                                               |
| 255083  | Ethik-Kommission an der Medizinischen Fakultät der Eberhard-Karls-Universität und am Universitätsklinikum Tübingen | Gartenstr. 47<br>72074 Tübingen                                                               |
| 252961  | Ethik-Kommission an der Medizinischen Fakultät der Eberhard-Karls-Universität und am Universitätsklinikum Tübingen | Gartenstr. 47<br>72074 Tübingen                                                               |
| 255081  | Ethik-Kommission an der Medizinischen Fakultät der Eberhard-Karls-Universität und am Universitätsklinikum Tübingen | Gartenstr. 47<br>72074 Tübingen                                                               |
| 254392  | Ethik-Kommission an der Medizinischen Fakultät der Eberhard-Karls-Universität und am Universitätsklinikum Tübingen | Gartenstr. 47<br>72074 Tübingen                                                               |
| 256836  | Ethik-Kommission an der Medizinischen Fakultät der Eberhard-Karls-Universität und am Universitätsklinikum Tübingen | Gartenstr. 47<br>72074 Tübingen                                                               |
| 255128  | Ethik-Kommission an der Medizinischen Fakultät der Eberhard-Karls-Universität und am Universitätsklinikum Tübingen | Gartenstr. 47<br>72074 Tübingen                                                               |
| 256314  | Ethik-Kommission an der Medizinischen Fakultät der Eberhard-Karls-Universität und am Universitätsklinikum Tübingen | Gartenstr. 47<br>72074 Tübingen                                                               |
| 254395  | Ethik-Kommission an der Medizinischen Fakultät der Eberhard-Karls-Universität und am Universitätsklinikum Tübingen | Gartenstr. 47<br>72074 Tübingen                                                               |
| 253512  | Ethik-Kommission an der Medizinischen Fakultät der Eberhard-Karls-Universität und am Universitätsklinikum Tübingen | Gartenstr. 47<br>72074 Tübingen                                                               |
| 254387  | Ethik-Kommission an der Medizinischen Fakultät der Eberhard-Karls-Universität und am Universitätsklinikum Tübingen | Gartenstr. 47<br>72074 Tübingen                                                               |
| 255053  | Ethik-Kommission an der Medizinischen Fakultät der Eberhard-Karls-Universität und am Universitätsklinikum Tübingen | Gartenstr. 47<br>72074 Tübingen                                                               |

cobimetinib (RO5514041) Roche Clinical Study Report - Protocol G028141 -  
 Research Report 1.060643 7.487

# coBRIM IRB List

| CRT No. | EC/IRB                                                                                                             | Address                                                                            |
|---------|--------------------------------------------------------------------------------------------------------------------|------------------------------------------------------------------------------------|
| 256326  | Ethik-Kommission an der Medizinischen Fakultät der Eberhard-Karls-Universität und am Universitätsklinikum Tübingen | Gartenstr. 47<br>72074 Tübingen                                                    |
| 252967  | Ethik-Kommission an der Medizinischen Fakultät der Eberhard-Karls-Universität und am Universitätsklinikum Tübingen | Gartenstr. 47<br>72074 Tübingen                                                    |
| 255082  | Ethik-Kommission an der Medizinischen Fakultät der Eberhard-Karls-Universität und am Universitätsklinikum Tübingen | Gartenstr. 47<br>72074 Tübingen                                                    |
| 255011  | Ethik-Kommission an der Medizinischen Fakultät der Eberhard-Karls-Universität und am Universitätsklinikum Tübingen | Gartenstr. 47<br>72074 Tübingen                                                    |
| 252971  | Ethik-Kommission an der Medizinischen Fakultät der Eberhard-Karls-Universität und am Universitätsklinikum Tübingen | Gartenstr. 47<br>72074 Tübingen                                                    |
| 254413  | Ethik-Kommission an der Medizinischen Fakultät der Eberhard-Karls-Universität und am Universitätsklinikum Tübingen | Gartenstr. 47<br>72074 Tübingen                                                    |
| 257886  | Ethik-Kommission an der Medizinischen Fakultät der Eberhard-Karls-Universität und am Universitätsklinikum Tübingen | Gartenstr. 47<br>72074 Tübingen                                                    |
| 252969  | Ethik-Kommission an der Medizinischen Fakultät der Eberhard-Karls-Universität und am Universitätsklinikum Tübingen | Gartenstr. 47<br>72074 Tübingen                                                    |
| 256896  | Ethics Committee for Clinical Pharmacology of the Medical Research Council                                         | H-1051 Budapest, Zrinyi u. 3.                                                      |
| 256897  | Ethics Committee for Clinical Pharmacology of the Medical Research Council                                         | H-1051 Budapest, Zrinyi u. 3.                                                      |
| 256859  | Ethics Committee for Clinical Pharmacology of the Medical Research Council                                         | H-1051 Budapest, Zrinyi u. 3.                                                      |
| 257397  | Ethics Committee for Clinical Pharmacology of the Medical Research Council                                         | H-1051 Budapest, Zrinyi u. 3.                                                      |
| 252811  | Rambam EC                                                                                                          | Rambam Health Care Campus 6 Ha'Aliya Street POB 9602 Haifa 31096 Israel            |
| 254431  | Rabin EC                                                                                                           | Rabin Medical Center Beilinson Hospital: 39 Jabotinsky St., Petah Tikva            |
| 252828  | Hadassah EC                                                                                                        | Hadassah Medical Center Kiryat Hadassah, POB 12000 Jerusalem, 91120, Israel        |
| 252826  | Sourasky EC                                                                                                        | Tel Aviv Sourasky Medical Center address: 6 Weizmann Street Tel Aviv 64239, Israel |
| 252757  | Sheba EC                                                                                                           | the Chaim Sheba Medical Center - Tel Hashomer 52621, Israel                        |
| 252951  | Soroka EC                                                                                                          | Soroka University Medical Center POB 151, Beer-Sheva                               |

cobrimetrib (RO5514041) Roche Clinical Study Report - Protocol CO28141 -  
 Research Report 1 060643 7 498

# coBRIM IRB List

| CRT No. | EC/IRB                                                                                                                             | Address                                                                                 |
|---------|------------------------------------------------------------------------------------------------------------------------------------|-----------------------------------------------------------------------------------------|
| 252763  | Comitato Etico Provinciale della Provincia di Brescia                                                                              | Piazzale Spedali Civili n.1 25123 Brescia Italy                                         |
| 253588  | Comitato Etico Dell'Irccs Istituto Nazionale Per Lo Studio E La Cura Dei Tumori Fondazione Giovanni Pascale Di Napoli              | Via MARIANO SEMMOLA 80131 Napoli- Italy                                                 |
| 253607  | Comitato Etico CESC dell'IRCCS Istituto Oncologico Veneto (IOV)                                                                    | Via Gattamelata, 64 35128 Padova- Italy                                                 |
| 254903  | Comitato Etico Centrale IRCCS Lombardia                                                                                            | Giacomo Venezian, 1 20133 Milano - Italy                                                |
| 257793  | COMITATO ETICO CENTRALE IRCCS con sede IPO                                                                                         | Via Elio Chianesi, 53 00144 Roma - Italy                                                |
| 253784  | Comitato Etico dell' IRCCS Giovanni Paolo II di Bari                                                                               | Via Orazio Flacco 65 70126 Bari- Italy                                                  |
| 255078  | Comitato Etico Area Vasta Sud Est                                                                                                  | c/o U.O.C. Farmacia AOUS Viale Bracci 53100 Siena - Italy                               |
| 255085  | Comitato etico della provincia di Bergamo                                                                                          | Piazza Organizzazione Mondiale della Sanità (OMS), 1 24127 Bergamo - Italy              |
| 255086  | Comitato Etico Provinciale Di Modena                                                                                               | Via Del Pozzo, 71<br>41100 Modena - Italy                                               |
| 253609  | Comitato Etico Regionale Della Liguria                                                                                             | Largo Rocanna Benzì 10<br>16132 Genova- Italy                                           |
| 254363  | Comitato Etico Di Area Vasta Romagna Di Cesena E Istituto Scientifico Romagnolo Per Lo Studio E La Cura Dei Tumori Di Meldola (FC) | Via Piero Maroncelli, 40<br>47014 Meldola (FC) - Italy                                  |
| 255854  | Comitato etico degli IRCCS Istituto Europeo di Oncologia e Centro Cardiologico Monzino                                             | Via Ripamonti 435<br>20141 Milano - Italy                                               |
| 252548  | METC AzM/UM                                                                                                                        | Maastricht UMC, dep. METC AzM/UM, P. debeyelaan 25, 6229 HX Maastricht, the Netherlands |
| 253782  | METC AzM/UM                                                                                                                        | Maastricht UMC, dep. METC AzM/UM, P. debeyelaan 25, 6229 HX Maastricht, the Netherlands |
| 256404  | METC AzM/UM                                                                                                                        | Maastricht UMC, dep. METC AzM/UM, P. debeyelaan 25, 6229 HX Maastricht, the Netherlands |
| 253783  | Health and Disability Ethics Committees                                                                                            | 1 the Terrace, PO Box 5013, Wellington, 6011, New Zealand                               |
| 253582  | Health and Disability Ethics Committees                                                                                            | 1 the Terrace, PO Box 5013, Wellington, 6011, New Zealand                               |
| 254425  | REK sør-est                                                                                                                        | Nydalen allé 37B, 0484 Oslo                                                             |
| 254414  | REK sør-est                                                                                                                        | Nydalen allé 37B, 0484 Oslo                                                             |
| 257401  | Ethics Committee at the "Russian Oncology Scientific Center n.a. N.N. Blokhin"                                                     | Khashinskoe shosse,24, Moscow, 115478                                                   |
| 258059  | Ethics Committee at the Budgetary Healthcare Institution of the Omsk Region "Clinical Oncology Dispensary"                         | Zaver'yaeva ul. 9, korp. 1, Omsk, 644013                                                |
| 257399  | Ethics Committee at the State Territorial Budgetary Healthcare Institution "Altai Territory Oncology Dispensary"                   | Nikitina ul. 77, Barnaul, 656049                                                        |

# coBRIM IRB List

| CRT No. | EC/IRB                                                                                                              | Address                                                                     |
|---------|---------------------------------------------------------------------------------------------------------------------|-----------------------------------------------------------------------------|
| 257400  | Ethics Committee at the Moscow State Budgetary Healthcare Institution "Moscow City Oncology Hospital # 62"          | Istra settlement, 27, Krasnogorsk district, Moscow region, 143423           |
| 257398  | Ethics Committee at the Stavropol Territory State Budgetary Healthcare Institution "Pyatigorsk Oncology Dispensary" | Kalinina pr. 31, Pyatigorsk, 357500                                         |
| 254415  | CEIC Área 4 - Hospital Universitario Ramón y Cajal                                                                  | Ctra. De Colmenar Viejo, km. 9,1<br>28034, Madrid                           |
| 254417  | CEIC Área 4 - Hospital Universitario Ramón y Cajal                                                                  | Ctra. De Colmenar Viejo, km. 9,1<br>28034, Madrid                           |
| 254427  | CEIC Área 4 - Hospital Universitario Ramón y Cajal                                                                  | Ctra. De Colmenar Viejo, km. 9,1<br>28034, Madrid                           |
| 254423  | CEIC Área 4 - Hospital Universitario Ramón y Cajal                                                                  | Ctra. De Colmenar Viejo, km. 9,1<br>28034, Madrid                           |
| 254418  | CEIC Área 4 - Hospital Universitario Ramón y Cajal                                                                  | Ctra. De Colmenar Viejo, km. 9,1<br>28034, Madrid                           |
| 252952  | CEIC Área 4 - Hospital Universitario Ramón y Cajal                                                                  | Ctra. De Colmenar Viejo, km. 9,1<br>28034, Madrid                           |
| 254428  | CEIC Área 4 - Hospital Universitario Ramón y Cajal                                                                  | Ctra. De Colmenar Viejo, km. 9,1<br>28034, Madrid                           |
| 252816  | CEIC Área 4 - Hospital Universitario Ramón y Cajal                                                                  | Ctra. De Colmenar Viejo, km. 9,1<br>28034, Madrid                           |
| 255383  | Regionala etikprövningsnämnden i Lund                                                                               | Box 133, 221 00 Lund, Sweden                                                |
| 255385  | Regionala etikprövningsnämnden i Lund                                                                               | Box 133, 221 00 Lund, Sweden                                                |
| 255384  | Regionala etikprövningsnämnden i Lund                                                                               | Box 133, 221 00 Lund, Sweden                                                |
| 254905  | Regionala etikprövningsnämnden i Lund                                                                               | Box 133, 221 00 Lund, Sweden                                                |
| 254376  | Kantonale Ethikkommission<br>Bern                                                                                   | Postfach 56<br>3010 Bern                                                    |
| 252950  | Kantonale Ethikkommission<br>Zürich                                                                                 | Stampfenbachstrasse 121<br>(Eingang Georgengasse 6 benutzen)<br>8090 Zürich |
| 252753  | NRES Committee London - Brent                                                                                       | 80 London Road, Skipton House, London, SE1 6LH                              |
| 255856  | NRES Committee London - Brent                                                                                       | 80 London Road, Skipton House, London, SE1 6LH                              |
| 255126  | NRES Committee London - Brent                                                                                       | 80 London Road, Skipton House, London, SE1 6LH                              |
| 254378  | NRES Committee London - Brent                                                                                       | 80 London Road, Skipton House, London, SE1 6LH                              |
| 252825  | NRES Committee London - Brent                                                                                       | 80 London Road, Skipton House, London, SE1 6LH                              |

cobrimetrib (RO5514041) Roche Clinical Study Report - Protocol G028141 -  
 Research Report 1060643 7490

# coBRIM IRB List

| CRT No. | EC/IRB                                                                | Address                                                                      |
|---------|-----------------------------------------------------------------------|------------------------------------------------------------------------------|
| 255052  | NRES Committee London - Brent                                         | 80 London Road, Skipton House, London, SE1 6LH                               |
| 252754  | NRES Committee London - Brent                                         | 80 London Road, Skipton House, London, SE1 6LH                               |
| 252755  | NRES Committee London - Brent                                         | 80 London Road, Skipton House, London, SE1 6LH                               |
| 256313  | NRES Committee London - Brent                                         | 80 London Road, Skipton House, London, SE1 6LH                               |
| 256312  | NRES Committee London - Brent                                         | 80 London Road, Skipton House, London, SE1 6LH                               |
| 254381  | NRES Committee London - Brent                                         | 80 London Road, Skipton House, London, SE1 6LH                               |
| 255113  | NRES Committee London - Brent                                         | 80 London Road, Skipton House, London, SE1 6LH                               |
| 255127  | NRES Committee London - Brent                                         | 80 London Road, Skipton House, London, SE1 6LH                               |
| 256835  | NRES Committee London - Brent                                         | 80 London Road, Skipton House, London, SE1 6LH                               |
| 255080  | NRES Committee London - Brent                                         | 80 London Road, Skipton House, London, SE1 6LH                               |
| 254429  | St. Lukes Hospital and Health Network IRB                             | 801 Ostrum Street<br>Bethlehem, PA 18015                                     |
| 254364  | California Pacific Medical Center IRB                                 | 2200 Webster Street, 5th Floor<br>San Francisco, CA 94115                    |
| 252546  | Copernicus Group IRB                                                  | 1 Triangle Drive, Suite 100<br>Research Triangle Park, NC 27709              |
| 252957  | University of Louisville IRB                                          | Research Triangle Park, NC                                                   |
| 256893  | UC Davis IRB                                                          | 2921 Stockton Blvd<br>Suite 1400, Room 1429<br>Sacramento, CA 95817          |
| 255848  | WIRB                                                                  | Western Institutional Review Board 3535 7th Avenue SW Olympia, WA 98502      |
| 253109  | Rhode Island Hospital IRB                                             | RI IRB #2<br>593 Eddy Street<br>Providence, RI 02903                         |
| 252690  | University of California San Diego Human Research Protections Program | 9500 Gilman Drive, Mail Code 0052<br>La Jolla CA 92093                       |
| 254890  | University of Kansas IRB                                              | 3901 Rainbow Boulevard<br>Kansas City, KS 66160                              |
| 253110  | Dartmouth Committee for the Protection of Human Subjects (CPHS) IRB   | 63 South Main Street, Room 302<br>Hanover, NH 03755                          |
| 256833  | WIRB                                                                  | Western Institutional Review Board 3535 7th Avenue SW Olympia, WA 98502      |
| 252949  | Thomas Jefferson University                                           | 1015 Chestnut Street, Suite 1100<br>Philadelphia, PA 19107                   |
| 254899  | University of Chicago IRB                                             | McGiffert Hall, 2nd Floor<br>5751 South Woodlawn Avenue<br>Chicago, IL 60637 |

cobimetinib (RO5574041) Roche Clinical Study Report - Protocol G028141 -  
 Research Report 1 060 643 7491

# coBRIM IRB List

| CRT No. | EC/IRB                                                                         | Address                                                                   |
|---------|--------------------------------------------------------------------------------|---------------------------------------------------------------------------|
| 252481  | Copernicus Group IRB                                                           | 1 Triangle Drive, Suite 100<br>Research Triangle Park, NC 27709           |
| 259614  | WIRB                                                                           | Western Institutional Review Board 3535 7th Avenue SW Olympia, WA 98502   |
| 255079  | WIRB                                                                           | Western Institutional Review Board 3535 7th Avenue SW Olympia, WA 98502   |
| 252621  | Kaiser Permanente IRB - Northern California                                    | 1800 Harrison Street, 16th Floor<br>Oakland CA, 94612                     |
| 255123  | Chesapeake IRB                                                                 | 7063 Columbia Gateway Drive, Suite 110<br>Columbia, MD 21046              |
| 255115  | Northwestern University IRB                                                    | 750 N. Lake Shore Drive - 7th Floor<br>Chicago IL, 60611                  |
| 256321  | WIRB                                                                           | Western Institutional Review Board 3535 7th Avenue SW Olympia, WA 98502   |
| 252547  | Washington University in St. Louis IRB                                         | 660 S. Euclid Ave., Box 8089<br>St. Louis MO 63110                        |
| 257373  | Institutional Review Board of Mount Sinai Medical Center                       | 4300 Alton Road<br>Miami Beach, FL 33140                                  |
| 256320  | TriHealth Institutional Review Board                                           | 10498 Montgomery Road, Suite A Cincinnati OH 45242                        |
| 255119  | Mayo Clinic IRB - Rochester                                                    | 200 First Street SW<br>201 Building Rm 4-60<br>Rochester, MN 55905        |
| 252689  | Copernicus Group IRB                                                           | 1 Triangle Drive, Suite 100<br>Research Triangle Park, NC 27709           |
| 254356  | Copernicus Group IRB                                                           | 1 Triangle Drive, Suite 100<br>Research Triangle Park, NC 27709           |
| 256894  | WIRB                                                                           | Western Institutional Review Board 3535 7th Avenue SW Olympia WA 98502    |
| 254891  | Biomedical Research Alliance of New York, LLC                                  | One Park Avenue, 6th Fl New York, NY 10016                                |
| 252691  | MD Anderson Cancer Center Orlando IRB                                          | 1414 Kuhl Avenue Orlando, FL 32806                                        |
| 254359  | Vanderbilt University Medical Center IRB                                       | 1313 21st Avenue South, Ste 504 OH Nashville, TN 37232                    |
| 254900  | UCLA Medical Center IRB                                                        | 11000 Kinross Ave, Ste. 211 Box 951694 Los Angeles, CA 90095              |
| 252734  | University of Minnesota Institutional Review Board                             | 420 Delaware Street SE D-528 Mayo Memorial Building Minneapolis, MN 55455 |
| 252618  | Duke University Health System Institutional Review Board                       | 2424 Erwin Road, Suite 405<br>Durham, NC 27710                            |
| 253467  | Hartford Hospital IRB                                                          | 80 Seymour Street P.B. Box 5037<br>Hartford, CT 06102                     |
| 253107  | Stanford University Administrative Panel on Human Subjects in Medical Research | 1501 South California Avenue<br>Palo Alto, CA 94304                       |
| 256305  | WIRB                                                                           | Western Institutional Review Board 3535 7th Avenue SW Olympia, WA 98502   |
| 253108  | Copernicus Group IRB                                                           | 1 Triangle Drive, Suite 100 Research Triangle Park, NC 27709              |

cobimetinib (RO5514041) Roche Clinical Study Report - Protocol G028141 -  
 Research Report 1060643 7482
